# Supplementary material for: Mechanosensitive caveolin-1 activation-induced PI3K/Akt/mTOR signaling pathway promotes breast cancer motility, invadopodia formation and metastasis in vivo
Source: PubMed Central journal article supplement (PMC4941310; doi:10.18632/oncotarget.7583), 2016-02-22
Supplement: oncotarget-07-16227-s001.pdf [file oncotarget-07-16227-s001.pdf]

## Mechanosensitive caveolin-1 activation-induced PI3K/Akt/mTOR signaling pathway promotes breast cancer motility, invadopodia formation and metastasis *in vivo*

### Supplementary Materials

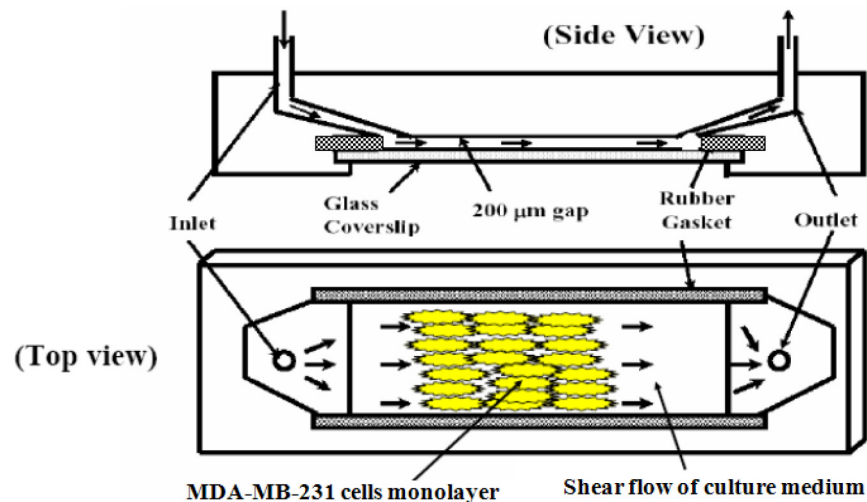

**Supplementary Figure S1: Cross-sectional diagram of parallel flow chamber system for shear stress exposure.** The coverslip with near 90% confluent monolayer of MDA-MB-231 cells was mounted over the groove with the cells facing the inside, and an approximate 200 µm high gap was formed over the MDA-MB-231 cells.

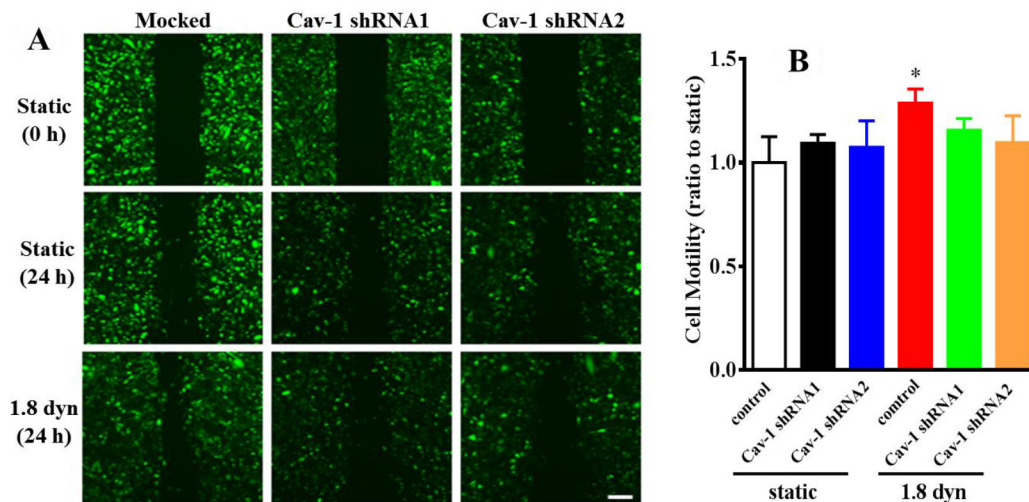

**Supplementary Figure S2: Downregulation of cav-1 expression decreased the low shear stress-induced cell motility by wound healing assay.** MDA-MB-231 cells were stably transfected with shRNA targeting caveolin-1 (cav-1 shRNA1 or cav-1 shRNA2), and kept under static condition as control or subjected to low shear stress for 1 h. The monolayers were wounded with a pipet tip, and stained by calcein-AM. The images were recorded at 0 and 24 h post-wounding (A). The wounded area was measured with the ImageJ software (NIH, USA), and the cell motility was quantified by calculating wound closure from six microscopic fields for each sample (B) and was expressed as mean  $\pm$  SD. \* $p < 0.05$  control at 1.8 dyn vs. Cav-1 silencing at 1.8 dyn.
